# Supplementary material
Source: publisher figshare collection journal article supplement (https://frontiersin.figshare.com/ndownloader/files/31516910)
Supplement: Supplementary file 1 [file 31516910]

| **Primer name** | **Sequence (5’ to 3’)** |
| --- | --- |
| CBSV - F | GCCAACTARAACTCGAAGTCCATT |
| CBSV - R | TTCAGTTGTTTAAGCAGTTCGTTCA |
| CBSV CP-Probe | [FAM]-AGTCAAGGAGGCTTCGTGCYCCTC-[BHQ1] |
| UCBSV - F | AGATYAAGAARACDTTCAAGCCTCCAA |
| UCBSV - R | AATTACATCAGGRGTTAGRTTRTCCCTT |
| UCBSV CP-Probe | [HEX]-TCAGCTTACATTTGGATTCCACGCTCTCA-[BHQ1] |
| COX-F | CGTCGCATTCCAGATTATCCA |
| COX-R | CAACTACGGATATATAAGRRCCRRAACTG |
| COX-Probe | [HEX]-AGGGCATTCCATCCAGCGTAAGCA-[BHQ1] |
